# Supplementary material for: NUAK1 (ARK5) Is Associated with Poor Prognosis in Ovarian Cancer
Source: PubMed Central journal article supplement (PMC5081368; doi:10.3389/fonc.2016.00213), 2016-10-27

# Supplemental Figure 2

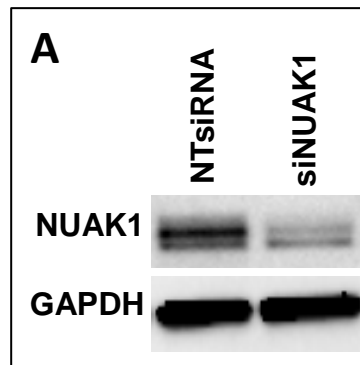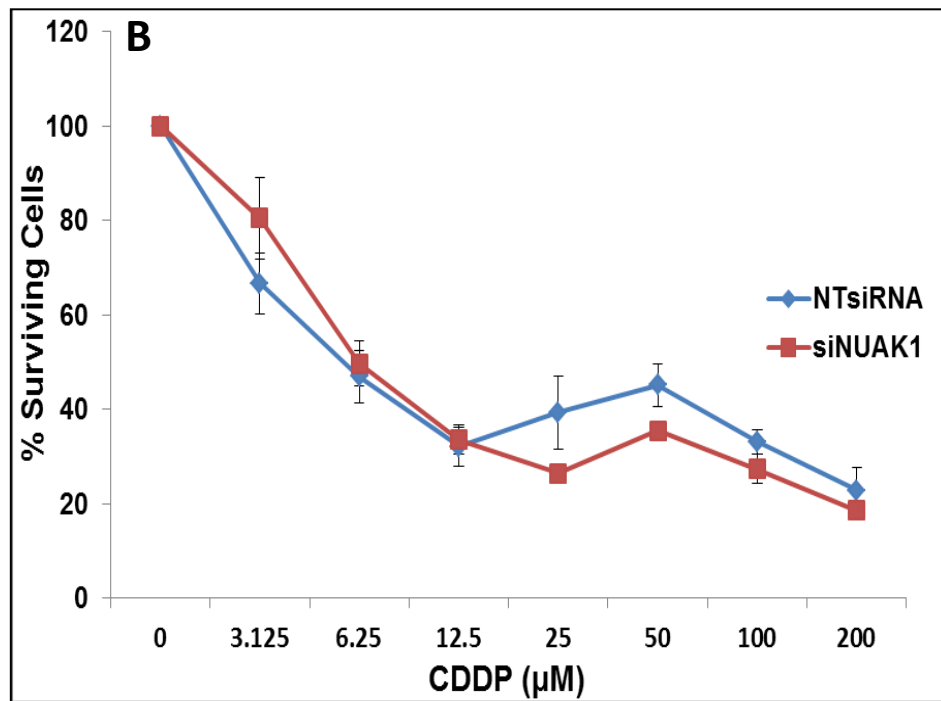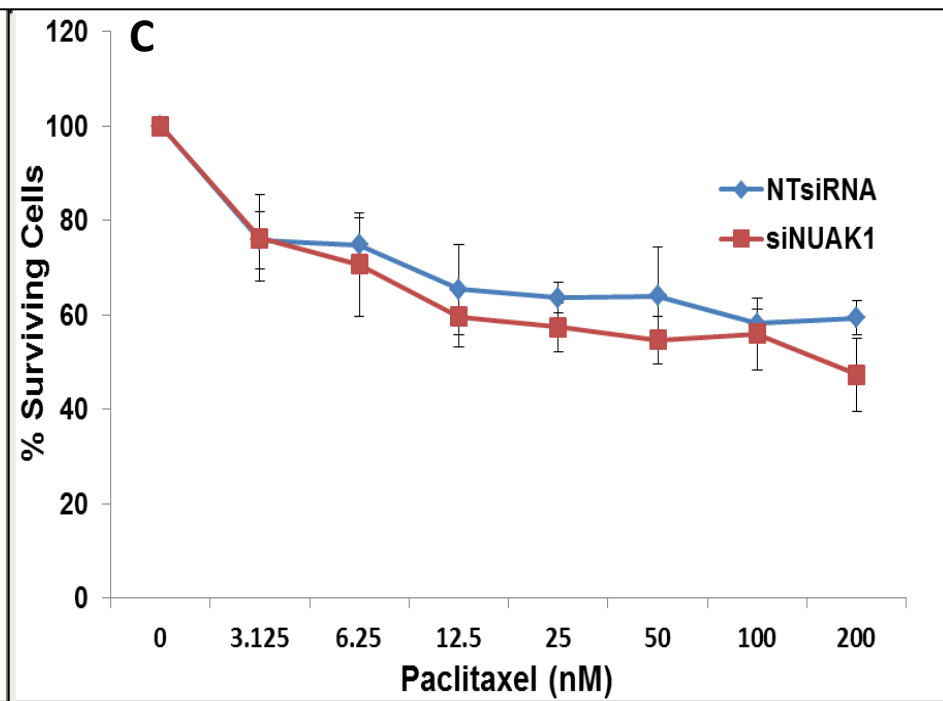

Supplement: Image_2.pdf [file Image_2.pdf]
