# Supplementary material for: NUAK1 (ARK5) Is Associated with Poor Prognosis in Ovarian Cancer
Source: PubMed Central journal article supplement (PMC5081368; doi:10.3389/fonc.2016.00213), 2016-10-27
Supplement: Table_1.pdf [file Table_1.pdf]

## Supplemental Table 1

**Cox regression modeling was performed to examine the relationship between NUAK1 transcript expression<sup>ϕ</sup> and overall survival**

| Cohort       | Univariate Modeling |       |             |         | Multivariate Modeling † |       |             |          |
|--------------|---------------------|-------|-------------|---------|-------------------------|-------|-------------|----------|
|              | N                   | HR    | 95% CI      | p       | N <sup>1</sup>          | aHR   | 95% CI      | p        |
| Discovery ¥  | 1262                | 1.229 | 1.147-1.316 | 4.2E-09 | 1262                    | 1.19  | 1.118-1.283 | 3.03E-07 |
| Validation Ψ | 174                 | 2.039 | 1.094-3.801 | 0.025   | 174                     | 1.029 | 3.46        | 0.04     |

N: number of patients, HR (hazard ratio), CI (confidence interval), aHR (stage adjusted hazard ratio).

ϕ NUAK1 transcript expression was evaluated as a continuous variable with HR and 95 CI as well as aHR and 95% CI calculated per unit increase in transcript expression level.

† Multivariate Cox modeling adjusted for stage at diagnosis.

¥ Discovery cohorts with Affymetrix derived transcript data for NUAK1 from Bonome<sup>13</sup>, Denkert<sup>14</sup>, Dressman<sup>15</sup>, Mok<sup>17</sup>, Tothill<sup>18</sup>, Mateescu<sup>16</sup> and TCGA<sup>3</sup>.

Ψ Validation cohort with Agilent derived transcript data for NUAK1 from Konecny<sup>19</sup>.
