# Supplementary material for: NUAK1 (ARK5) Is Associated with Poor Prognosis in Ovarian Cancer
Source: PubMed Central journal article supplement (PMC5081368; doi:10.3389/fonc.2016.00213), 2016-10-27
Supplement: Table_2.pdf [file Table_2.pdf]

## Supplemental Table 2

**Cox regression modeling was performed to examine the relationship between NUAK1 transcript expression<sup>ϕ</sup> and progression-free survival**

| Cohort      | Univariate Modeling |       |             |        | Multivariate Modeling † |      |             |       |
|-------------|---------------------|-------|-------------|--------|-------------------------|------|-------------|-------|
|             | N                   | HR    | 95% CI      | p      | N                       | aHR  | 95% CI      | p     |
| Discovery ¥ | 802                 | 1.134 | 1.048-1.227 | 0.0018 | 802                     | 1.09 | 1.006-1.182 | 0.036 |

N: number of patients, HR (hazard ratio), CI (confidence interval), aHR (stage adjusted hazard ratio).

ϕ NUAK1 transcript expression was evaluated as a continuous variable with HR and 95 CI as well as aHR and 95% CI calculated per unit increase in transcript expression level.

† Multivariate Cox modeling adjusted for stage at diagnosis.

¥ Discovery cohorts with Affymetrix derived transcript data for NUAK1 from Bonome<sup>13</sup>, Denkert<sup>14</sup>, Dressman<sup>15</sup>, Mok<sup>17</sup>, Tothill<sup>18</sup>, Mateescu<sup>16</sup> and TCGA<sup>3</sup>. Progression-free survival data was not available for the Validation cohort (Konecny<sup>19</sup>).
