# Supplementary material for: NUAK1 (ARK5) Is Associated with Poor Prognosis in Ovarian Cancer
Source: PubMed Central journal article supplement (PMC5081368; doi:10.3389/fonc.2016.00213), 2016-10-27
Supplement: Table_3.pdf [file Table_3.pdf]

## Supplemental Table 3

Logistic regression modeling was performed using transcript expression of NUA1 as a continuous variable in the subset of cases with evaluable data to predict advanced age at diagnosis, advanced stage, wildtype BRCA1/2 status, any residual disease or one of the molecular subtypes.

| Predicted State                          | N    | OR     | 95% CI       | p-value |
|------------------------------------------|------|--------|--------------|---------|
| Advanced Age at Diagnosis ( $\geq 60$ )  | 943  | 1.220  | 1.091-1.364  | 0.0005  |
| Advanced Stage (III or IV)               | 1262 | 1.703  | 1.388-2.090  | <0.0001 |
| Wildtype BRCA1/2 Status                  | 545  | 0.979  | 0.776-1.235  | NS      |
| Any Residual Disease                     | 761  | 1.582  | 1.354-1.849  | <0.0001 |
| Mesenchymal Subtype – TCGA classifier    | 472  | 14.493 | 8.428-24.923 | <0.0001 |
| – Verhaak classifier                     | 504  | 5.481  | 4.020-7.472  | <0.0001 |
| – Konecny classifier                     | 182  | 3.413  | 2.213-5.264  | <0.0001 |
| Differentiated Subtype – TCGA classifier | 472  | 0.398  | 0.316-0.501  | <0.0001 |
| – Verhaak classifier                     | 504  | 0.317  | 0.243-0.414  | <0.0001 |
| – Konecny classifier                     | 182  | 0.265  | 0.169-0.417  | <0.0001 |
| Proliferative Subtype – TCGA classifier  | 472  | 0.957  | 0.798-1.148  | NS      |
| – Verhaak classifier                     | 504  | 0.749  | 0.596-0.941  | 0.013   |
| – Konecny classifier                     | 182  | 1.293  | 0.944-1.769  | NS      |
| Immunoreactive Subtype – TCGA classifier | 472  | 0.657  | 0.533-0.811  | <0.0001 |
| – Verhaak classifier                     | 504  | 0.802  | 0.675-0.953  | 0.012   |
| – Konecny classifier                     | 182  | 0.946  | 0.694-1.289  | NS      |

N (number of patients), OR (odds ratio), CI (confidence interval), NS (not significant with  $p > 0.05$ )
